# Supplementary material
Source: publisher figshare collection journal article supplement (https://tandf.figshare.com/articles/dataset/_/11506410)
Supplement: Supplementary file 1 [file 1]

Archive with 6 entries (6 files):
- tlct_a_1706111_sm2276.avi
- tlct_a_1706111_sm2274.avi
- tlct_a_1706111_sm2272.avi
- tlct_a_1706111_sm2228.avi
- tlct_a_1706111_sm2186.avi
- tlct_a_1706111_sm2185.pdf
